# Supplementary material for: Supramolecular Hydrogen Bonding Assembly from Non-Coplanar Aromatic Tetra-1H-Pyrazoles with Crystallization-Induced Emission (CIE)
Source: MDPI journal article supplement (doi:10.3390/ijms23084206), 2022-04-11
Supplement: s1 [file s1]

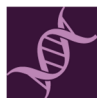

## Supplementary Materials

### Contents

1. Synthesis and calculation
2. X-ray diffraction measurement
3. Powder X-ray diffraction
4. Photoluminescence properties

### 1. Synthesis and calculation

#### Materials and Methods

**General:** All operations were carried out under an argon atmosphere by using standard Schlenk techniques, unless otherwise stated. The starting materials 4-(4,4,5,5-tetramethyl-1,3,2-dioxaborolan-2-yl)-1H-pyrazole, 1,2,4,5-tetrabromobenzene, 1,3,6,8-tetrabromopyrene, 1,1,2,2-tetrakis(4-bromophenyl)ethane and other reagents were obtained as analytical grade from variety commercial providers and used without further purification.

**Measurements:**  $^1\text{H}$  NMR and  $^{13}\text{C}$  NMR experiments were performed on Bruker Avance DMX400. Elemental analyses (C, H, N) were carried out with a PECHN 2400 analyzer. Column chromatographic separations were carried out on silica gel (200–300 mesh).

#### Experimental Details

##### 1,2,4,5-tetra(1H-pyrazol-4-yl)benzene (1).

Compound 1 was synthesized via Suzuki coupling reaction. A mixture of n-Butanol/water (180 mL, 3:1 v/v) containing 1,2,4,5-tetrabromobenzene (1.5 g, 3.81 mmol), 1-(tetrahydro-pyran-2-yl)-4-pyrazoleboronic acid pinacol ester (8.0 g, 28.76 mmol), tetrakis(triphenylphosphine)palladium (0.66 g, 0.29 mmol) and potassium carbonate (3.90 g, 14.29 mmol) was heated at 75–80 °C under stirring for 72 h. The resulting white precipitate was filtered off, dried under vacuum and then purified by column chromatography using ethyl acetate/petroleum ether (15:1) as eluent. 1,2,4,5-tetra(1H-pyrazol-4-yl)benzene (1) was obtained by deprotecting 1,2,4,5-tetrakis(1-(tetrahydro-2H-pyran-2-yl)-1H-pyrazol-4-yl)benzene in methanol (10 mL) and dichloromethane (20 mL) in the presence of 1 M HCl (5 mL) at room temperature. The product precipitated as a white solid which was filtered off and dried under vacuum (yield: 82%).  $^1\text{H}$  NMR (400 MHz,  $d_6$ -DMSO, 298 K)  $\delta$ : 12.79 (s, 4H), 7.56 (s, 4H), 7.36 (s, 2H), 7.36 (s, 4H).  $^{13}\text{C}$  NMR (100 MHz,  $d_6$ -DMSO, 298 K)  $\delta$ : 138.55, 131.778, 130.37, 127.58, 120.65. Elem. Anal. Calcd. for  $\text{C}_{18}\text{H}_{14}\text{N}_8$ : C, 63.15; H, 4.12; N, 32.73%. Found: C, 63.64; H, 4.02; N, 32.65%.

##### 1,3,6,8-tetra(1H-pyrazol-4-yl)pyrene (2).

Compound 2 was synthesized by performing a Suzuki coupling reaction. A mixture of n-Butanol/water (300 mL, 3:1 v/v) containing 1,3,6,8-tetrabromopyrene (3.94 g, 7.62 mmol), 1-(tetrahydro-pyran-2-yl)-4-pyrazoleboronic acid pinacol ester (8.0 g, 28.76 mmol), tetrakis(triphenylphosphine)palladium (0.66 g, 0.29 mmol) and potassium carbonate (3.90 g, 14.29 mmol) was heated at 75–80 °C under stirring for 72 h. The resulting blackish green precipitate was filtered off, dried under vacuum and then purified by column chromatography using ethyl acetate/petroleum ether (15:1) as eluent. 1,3,6,8-tetra(1H-pyrazol-4-yl)pyrene (2), was obtained by deprotecting 1-(tetrahydro-pyran-2-yl)-4-pyrazoleboronic acid pinacol ester in methanol (5 mL) and dichloromethane (10 mL) in the presence of 1 M HCl (4 mL) at room temperature. The product precipitated as a green solid which was filtered off and dried under vacuum (yield: 72%).  $^1\text{H}$  NMR (400 MHz,  $d_6$ -DMSO, 298 K)  $\delta$ : 13.16 (s, 1H), 8.42 (s, 4H), 8.16 (s, 8H), 8.11 (s, 2H).  $^{13}\text{C}$  NMR (100 MHz,  $d_6$ -DMSO, 298 K)

$\delta$ : 130.57, 129.18, 128.80, 127.20, 126.31, 125.02, 120.13. Elem. Anal. Calcd. For  $C_{28}H_{18}N_8$ : C, 72.09; H, 3.89; N, 24.02%. Found: C, 72.04; H, 3.90; N, 24.05%.

#### Synthesis of 1,1,2,2-tetrakis(4-(1H-pyrazol-4-yl)phenyl)ethene (3).

Compound 3 was synthesized by performing a Suzuki coupling reaction. A mixture of n-Butanol/water (300 mL, 3:1 v/v) containing 1,1,2,2-tetrakis(4-bromophenyl)ethene (4.94 g, 7.62 mmol), 1-(tetrahydro-pyran-2-yl)-4-pyrazoleboronic acid pinacol ester (8.0 g, 28.76 mmol), tetrakis(triphenylphosphine)palladium (0.66 g, 0.28 mmol) and potassium carbonate (3.90 g, 14.29 mmol) was heated at 75–80 °C under stirring for 72 h. The resulting baby blue precipitate was filtered off, dried under vacuum and then purified by column chromatography using ethyl acetate/petroleum ether (15:1). 1,1,2,2-tetrakis(4-(1H-pyrazol-4-yl)phenyl)ethene (3), was obtained by deprotecting 1,1,2,2-tetrakis(4-(1-(tetrahydro-2H-pyran-2-yl)-1H-pyrazol-4-yl)phenyl)ethane in methanol (10 mL) and dichloromethane (20 mL) in the presence of 1 M HCl (6 mL) at room temperature. The product precipitated as a yellowish solid which was filtered off and dried under vacuum (yield: 83%).  $^1\text{H}$  NMR (400 MHz,  $d_6$ -DMSO, 298 K)  $\delta$ : 12.90 (s, 1H), 8.14 (s, 1H), 7.86 (s, 1H), 7.40 (s, 1H), 6.99 (s, 1H).  $^{13}\text{C}$  NMR (100 MHz,  $d_6$ -DMSO, 298 K)  $\delta$ : 141.58, 140.04, 131.86, 131.49, 124.97, 121.27. Elem. Anal. Calcd. For  $C_{38}H_{28}N_8$ : C, 76.49; H, 4.73; N, 18.78 %. Found: C, 76.44; H, 4.72; N, 18.95%.

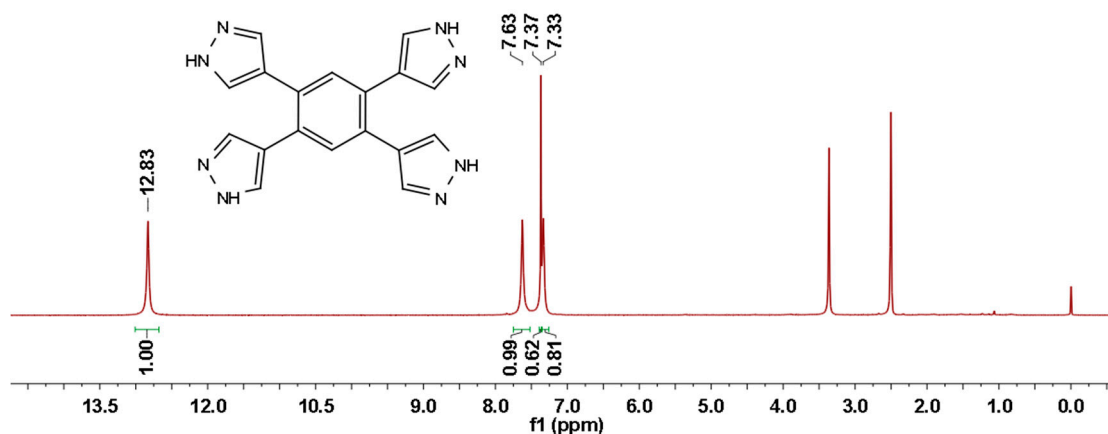

**Figure S1.**  $^1\text{H}$  NMR (400 MHz, 298 K) spectrum of compound 1 in  $d_6$ -DMSO.

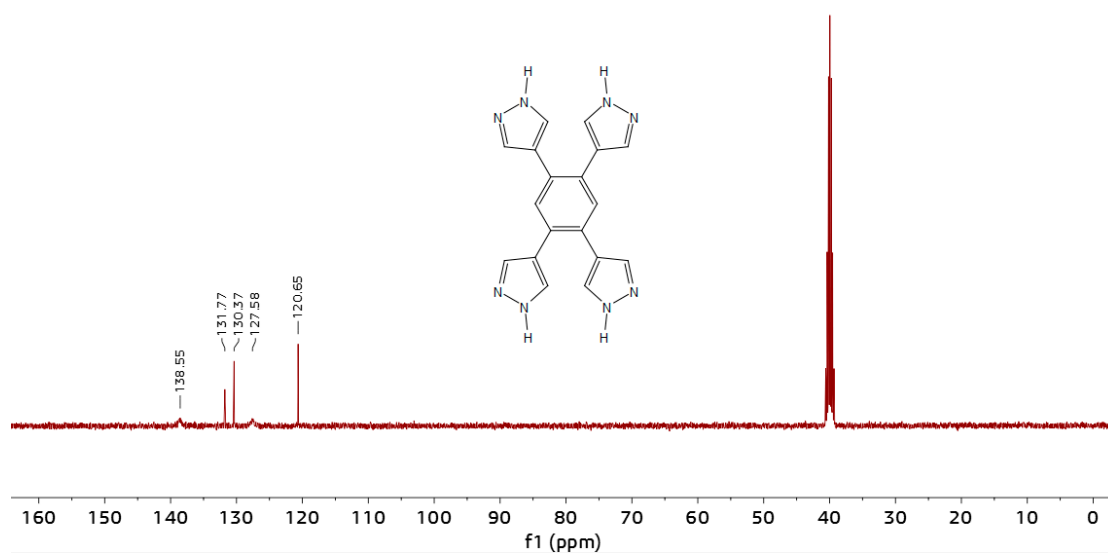

Figure S2. <sup>13</sup>C NMR (100 MHz, 298 K) spectrum of compound 1 in d<sub>6</sub>-DMSO.

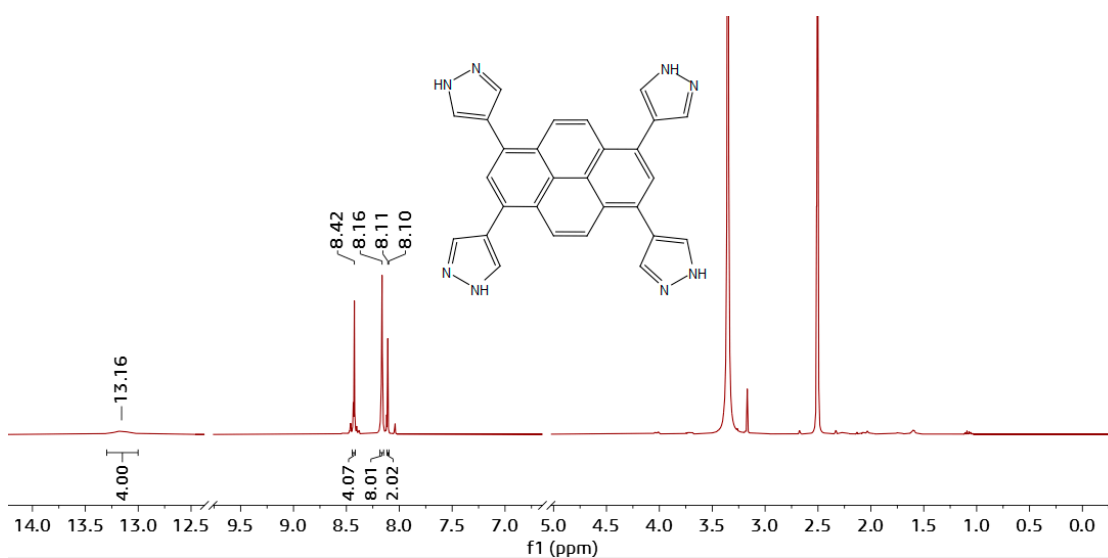

Figure S3. <sup>1</sup>H NMR (400 MHz, 298 K) spectrum of compound 2 in d<sub>6</sub>-DMSO.

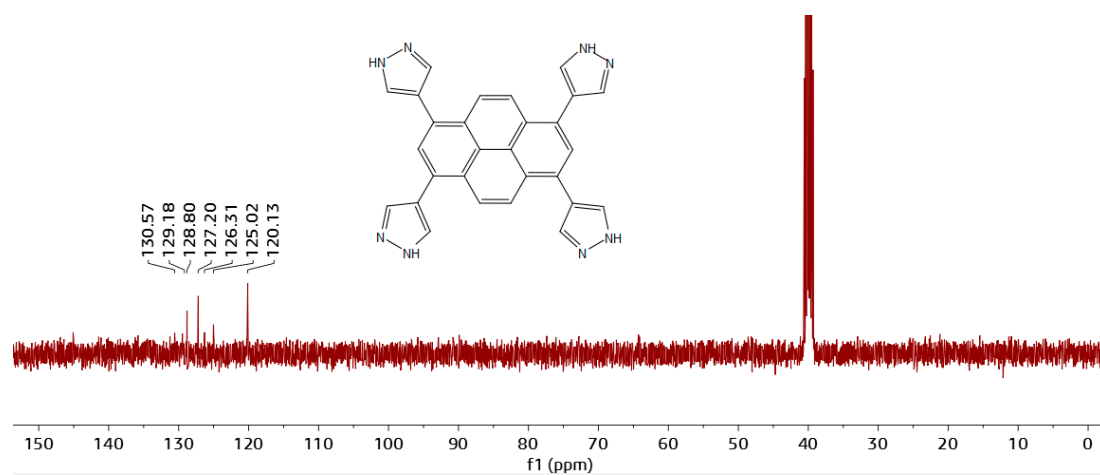

**Figure S4.** <sup>13</sup>C NMR (100 MHz, 298 K) spectrum of compound 2 in d<sub>6</sub>-DMSO.

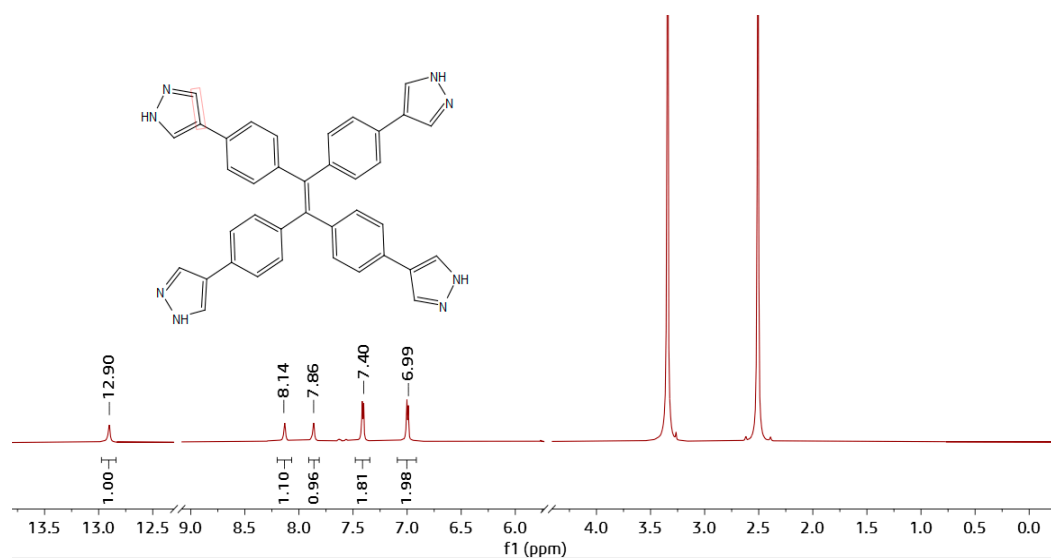

**Figure S5.** <sup>1</sup>H NMR (400 MHz, 298 K) spectrum of compound 3 in d<sub>6</sub>-DMSO.

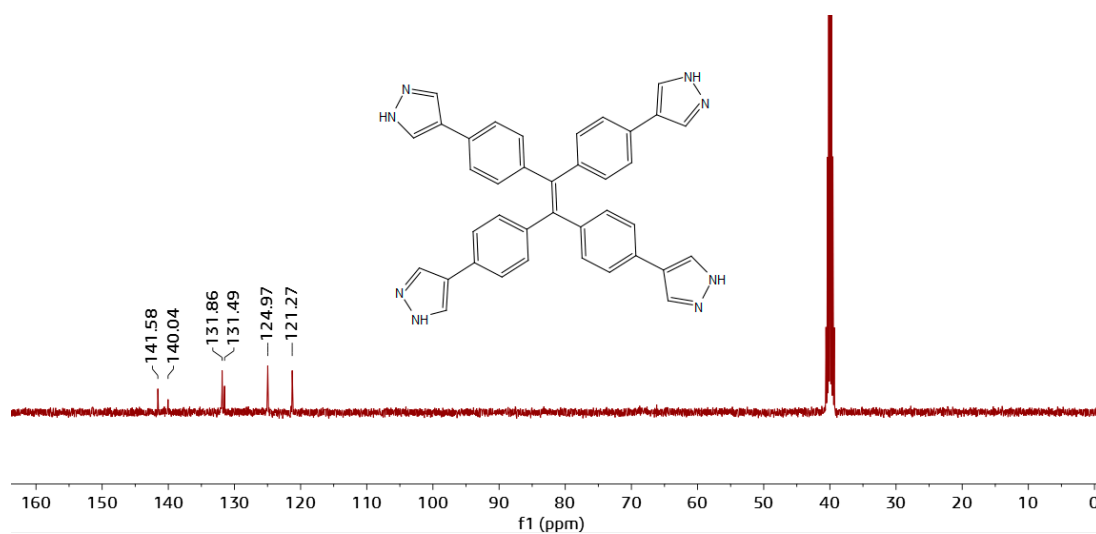

**Figure S6.**  $^{13}\text{C}$  NMR (100 MHz, 298 K) spectrum of **3** in  $\text{d}_6\text{-DMSO}$ .

## 2. X-ray diffraction measurement

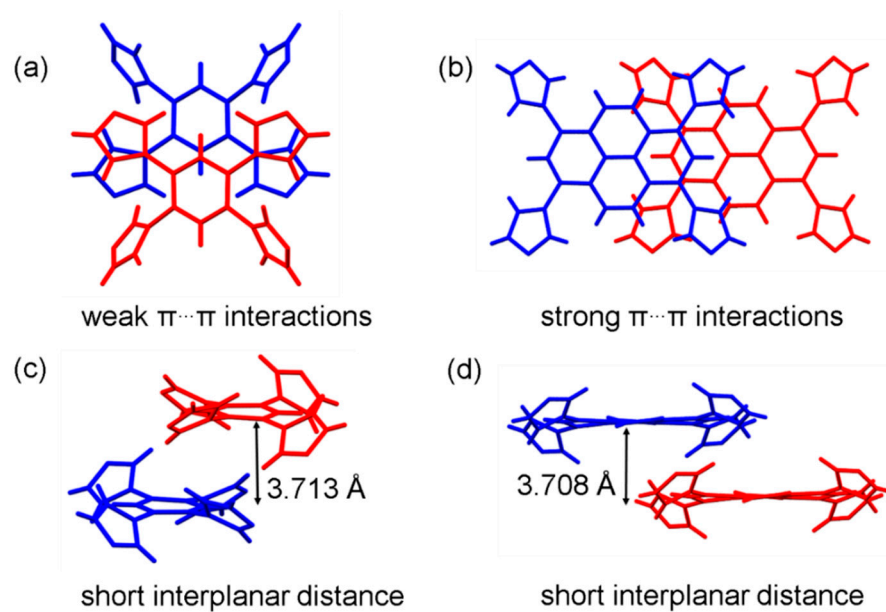

**Figure S7.**  $\pi\cdots\pi$  stacking between adjacent layers observed in structures of **HOF-1** and **HOF-2**.

**Table S1.** Crystal data and structure refinement for **HOF-1**, **HOF-2**, and **HOF-3**.

|                                                | <b>HOF-1</b>                                 | <b>HOF-2</b>                                  | <b>HOF-3</b>                                   |
|------------------------------------------------|----------------------------------------------|-----------------------------------------------|------------------------------------------------|
| Formula                                        | C <sub>9</sub> H <sub>7</sub> N <sub>4</sub> | C <sub>14</sub> H <sub>9</sub> N <sub>4</sub> | C <sub>38</sub> H <sub>28</sub> N <sub>8</sub> |
| Formula weight                                 | 171.19                                       | 233.25                                        | 596.68                                         |
| Temperature/K                                  | 293(2)                                       | 293(2)                                        | 293(2)                                         |
| Crystal system                                 | monoclinic                                   | orthorhombic                                  | tetragonal                                     |
| Space group                                    | <i>C12/c1</i>                                | <i>Pnma</i>                                   | <i>P-42<sub>1</sub>c</i>                       |
| a/Å                                            | 18.2734(17)                                  | 20.7995(16)                                   | 15.2584(4)                                     |
| b/Å                                            | 17.8342(19)                                  | 22.4471(18)                                   | 15.2584(4)                                     |
| c/Å                                            | 8.3083(9)                                    | 7.0754(5)                                     | 19.5201(12)                                    |
| α/°                                            | 90                                           | 90                                            | 90                                             |
| β/°                                            | 113.162(3)                                   | 90                                            | 90                                             |
| γ/°                                            | 90                                           | 90                                            | 90                                             |
| Volume/Å <sup>3</sup>                          | 2489.4(4)                                    | 3303.4(4)                                     | 4544.6(4)                                      |
| Z                                              | 8                                            | 8                                             | 4                                              |
| ρ <sub>calc</sub> /g/cm <sup>3</sup>           | 0.914                                        | 0.938                                         | 0.872                                          |
| μ/mm <sup>-1</sup>                             | 0.060                                        | 0.059                                         | 0.054                                          |
| F(000)                                         | 712                                          | 968                                           | 1248                                           |
| Crystal size/mm <sup>3</sup>                   | 0.34 × 0.34 × 0.32                           | 0.23 × 0.23 × 0.22                            | 0.34 × 0.32 × 0.30                             |
| 2θ range for data collection/°                 | 1.665 – 25.136                               | 1.814 – 23.308                                | 1.694 – 25.100                                 |
| Index ranges                                   | −21 ≤ h ≤ 21, −21 ≤ k ≤ 18, −9 ≤ l ≤ 9       | −23 ≤ h ≤ 22, −24 ≤ l ≤ 24, −7 ≤ k ≤ 7        | −15 ≤ h ≤ 14, −17 ≤ k ≤ 13, −21 ≤ l ≤ 23       |
| Reflections collected                          | 14233                                        | 25790                                         | 22134                                          |
| Independent reflections<br>[R <sub>int</sub> ] | 2217[0.0687]                                 | 2449 [0.1069]                                 | 4000 [0.0445]                                  |
| Data/restraints/parameters                     | 22217/0/120                                  | 2449/0/163                                    | 4000 / 0 / 208                                 |
| Goodness-of-fit on F <sup>2</sup>              | 1.076                                        | 1.171                                         | 1.032                                          |
| R1, wR2 (I > 2(I))                             | 0.0674, 0.2067                               | 0.1129, 0.3652                                | 0.0685, 0.2042                                 |
| R1, wR2 (all data)                             | 0.0925, 0.2306                               | 0.1445, 0.3912                                | 0.0965, 0.2268                                 |
| resid. el. dens. [e/Å <sup>3</sup> ]           | −0.474/1.059                                 | −0.473 / 0.571                                | −0.228 / 0.174                                 |
| CCDC number                                    | 2056570                                      | 2056571                                       | 2056572                                        |

### 3. Powder X-ray diffraction

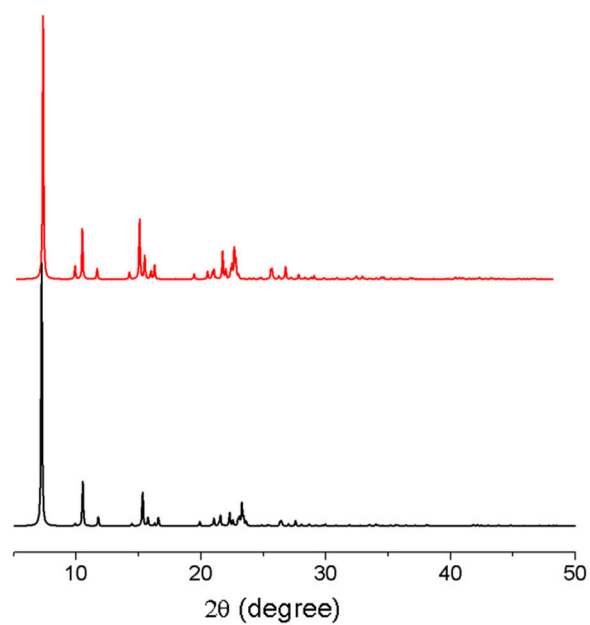

**Figure S8.** Powder X-ray diffraction (XRD) patterns of as-synthesized and simulated HOF-1.

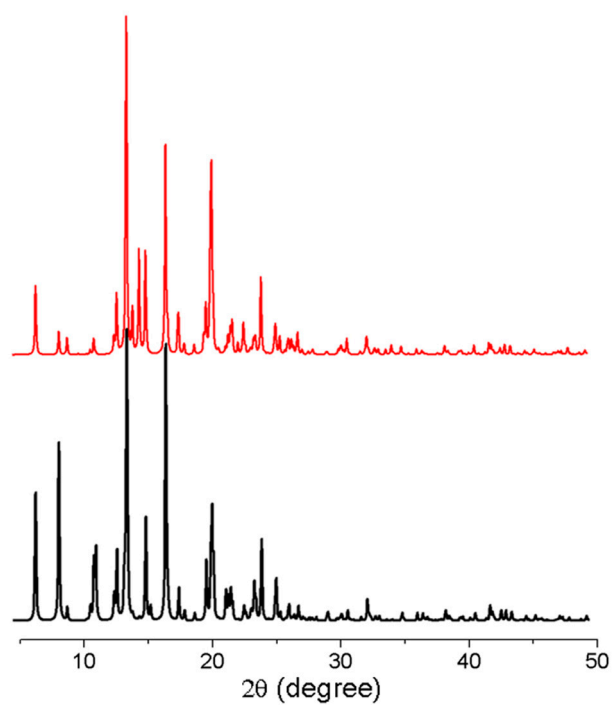

**Figure S9.** Powder X-ray diffraction (XRD) patterns of as-synthesized and simulated HOF-2.

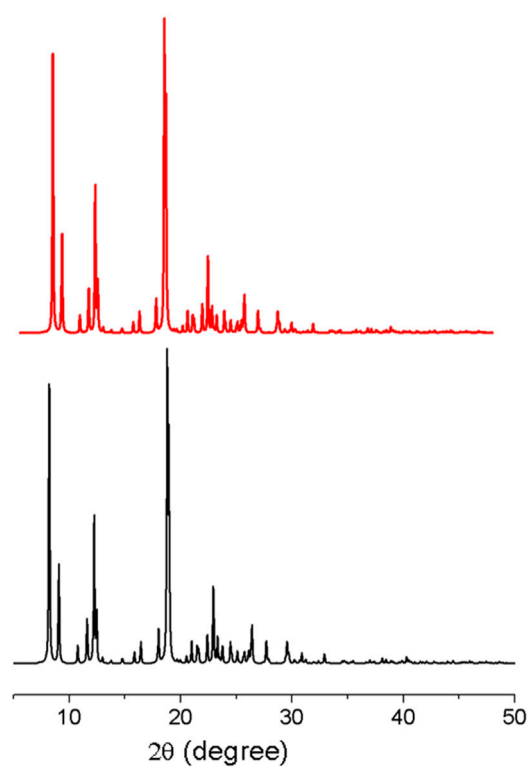

**Figure S10.** Powder X-ray diffraction (XRD) patterns of as-synthesized and simulated HOF-3.

#### 4. Photoluminescence properties

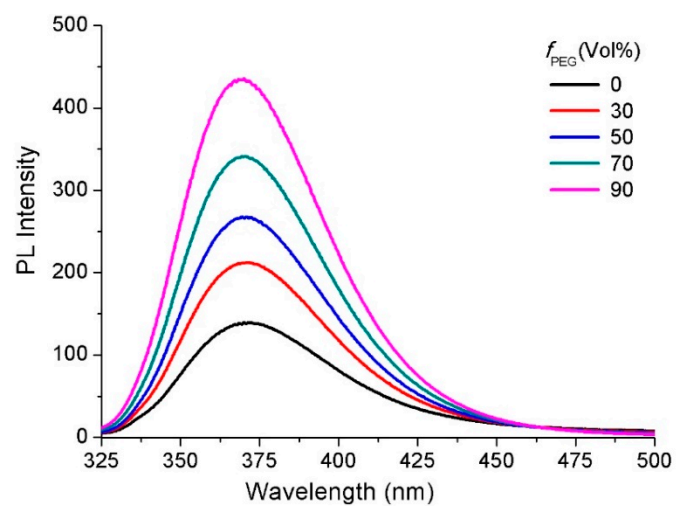

**Figure S11.** PL spectra of the dilute solutions of **1** ( $1.0 \cdot 10^{-5}$  mol L<sup>-1</sup>) in DMA – PEG1000 mixtures with different volume fractions of PEG1000. Excitation wavelength = 306 nm.



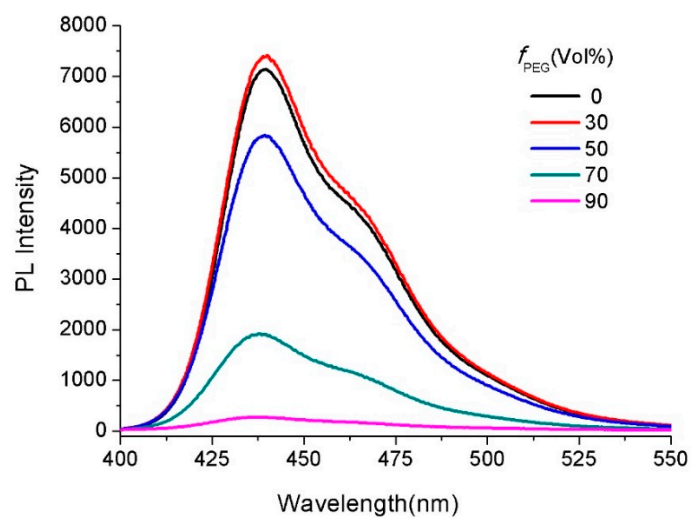

**Figure S12.** PL spectra of the dilute solutions of **2** ( $1.0 \cdot 10^{-5}$  mol L $^{-1}$ ) in DMA – PEG1000 mixtures with different volume fractions of PEG1000. Excitation wavelength = 385 nm.

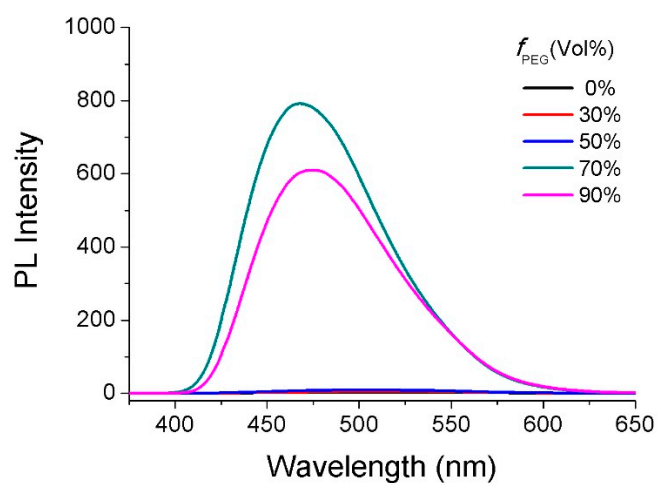

**Figure S13.** PL spectra of the dilute solutions of **3** ( $1.0 \cdot 10^{-5}$  mol L $^{-1}$ ) in DMA – PEG1000 mixtures with different volume fractions of PEG1000. Excitation wavelength = 376 nm.
